# Supplementary material for: Systematic Baikal seal hunting and exploitation at a single site since the Neolithic
Source: Research Square preprint supplement (doi:10.21203/rs.3.rs-8146110/v1), 2025-12-01
Supplement: Supplementary file 1 [file 25ef211c187aa3be0fb9b7c0.xlsx]

## Sheet: SI_Information
Table	Location	Location
Supplementary Table 1	SI_Tab_1	Number of Identified Specimens (NISP) and Minimum Number of Individuals (MNI) of all taxa identified at Tonkij Ushkany Island
Supplementary Table 2	SI_Tab_2	Seal skull and mandible fragments (with respect to R L and I)
Supplementary Table 3	SI_Tab_3	Seal dental elements recovered from the Tonkij Ushkany Island
Supplementary Table 4	SI_Tab_4	Seal pectoral and pelvic girdle elements and vertebrae
Supplementary Table 5	SI_Tab_5	Seal hand and foot elements recovered from the Tonkij Ushkany Island
Supplementary Table 6	SI_Tab_6	Seal long bone fragments recovered from the Tonkij Ushkany Island
Supplementary Table 7	SI_Tab_7	Minimum Number of Element (MNE) and percent Minimum Animal Units (%MAU) values for the seal remains, including bilateral MAU estimates for right and left, non-including indeterminate sides.
Supplementary Table 8	SI_Tab_8	Frequency of butchery marks and butchery process assessment based on remains of Baikal seals from the Ushkany Islands
Supplementary Table 9	SI_Tab_9	Anthropic modifications in bone fragments recovered from Tonkij Ushkany Island
Supplementary Table 10	SI_Tab_10	Frequency of cutmarks on fauna from Tonkij Ushkany island other than seal.
Supplementary Table 11	SI_Tab_11	Total NISP Breakage distribution following Reitz & Wing10
Supplementary Table 12	SI_Tab_12	Seal long bone fragmentation (NISP:MNE).
Supplementary Table 13	SI_Tab_13	Quantification of Baikal seal pathology - osteoarthrithis and/or myelithis
Supplementary Table 14	SI_Tab_14	Spearman rank correlation matrix of the seal bones
Supplementary Table 15	SI_Tab_15	Calibrated dates of seal bones corrected for fresh water reservoir effect (FRE) of Lake Baikal

## Sheet: SI_Tab_1
Supplementary Table 1 Number of Identified Specimens (NISP) and Minimum Number of Individuals (MNI) of all taxa identified at Tonkij Ushkany Island
	Order	Family	Taxon	NISP	% NISP	MNI
Aves - Indet				1	0.0011
	Anseriformes	Anatidae	Aythya nyroca	1	0.0011	1
	Pelecaniformes	Phalacrocorax spp.	Phalacrocorax spp.	1	0.0011	1
Mammalia - Indet				1	0.0011
Medium Mammal				88	0.0983
Medium/Large Mammals - Indet				17	0.019
Large Mammals - Indet				5	0.0056
	cf. Carnivora/Ursus sp.			2	0.0022
	Carnivora			9	0.0101	1
		Canidae	cf. Canis lupus	1	0.0011
			Canis lupus	3	0.0034	1
			Canis familiaris	1	0.0011	1
		Ursidae	cf. Ursus sp.	1	0.0011
			Ursus sp.	1	0.0011	1
	Pinnipedia
		Phocidae	cf. Pusa sibirica	229	0.2559
			Pusa sibirica	530	0.5922	17
	Artiodactyla
		medium ungulate		1	0.0011	1
		Bovidae		1	0.0011	1
		Equidae		1	0.0011	1
		Cervidae		1	0.0011	1
Total NISP				895	1	27
Identified by size				20
Not identified				20
Recent				5
Total fragments				940

## Sheet: SI_Tab_2
Supplementary Table 2 Seal skull and mandible fragments (with respect to R L and I)
	NISP				Total
	Right	Left	Axial	Indet.
Skul Fragments					80
Cranium	/	/	6	/	6
Occipital	/	/	5	/	5
Palatine	1	/	/	/	1
Pterygoid	1	/	/	/	1
Temporal	16	13	/	3	32
Nasal	/	/	/	2	2
Mandible	9	13	/	/	22
Isolated teeth	2	1	/	1	4
Cranium fragment with teeth	/	/	3	/	3
Mandible fragment with teeth	1	3	/	/	4

## Sheet: SI_Tab_3
Supplementary Table 3 Seal dental elements recovered from the Tonkij Ushkany Island
	Teeth (isolated and maxillary/mandbular)
	Upper		Lower
	Right	Left	Right	Left
Unid	4
I1	1	/	/	/
I2	/	1	/	/
I3	2	2	/	/
C	2	2	/	/
P1	2	2	/	/
P2	2	2	/	2
P3	1	1	1	1
P4	1	1	1	1
M1	1	1	1	1

## Sheet: SI_Tab_4
Supplementary Table 4 Seal pectoral and pelvic girdle elements and vertebrae
		NISP				Total
		Right	Left	Axial	Indet.
Scapula		6	8	/	/	14
Pelvis		7	6	/	1	14
Vertebrae						89
	Cervical			29		29
	Thoracic			36		36
	Lumbar			15		15
	Sacrum			9		9
Baculum		/	/	1	/	1

## Sheet: SI_Tab_5
Supplementary Table 5 Seal hand and foot elements recovered from the Tonkij Ushkany Island
		NISP				Total
		Right	Left	Axial	Indet.
Metacarpal						14
	MC1	3	2	/	/	5
	MC2	1	2	/	/	3
	MC3	/	1	/	/	1
	MC4	2	/	/	/	2
	MC5	1	1	/	1	3
Carpal		/	/	/	1	1
Metatarsal						52
	-	/	/	/	1	1
	MT1	7	6	/	/	13
	MT2	2	8	/	/	10
	MT3	7	5	/	/	12
	MT4	3	8	/	/	11
	MT5	3	2	/	/	5
Tarsal						26
	Calcaneus	2	2	/	/	4
	Talus	7	4	/	/	11
	TAR1	7	/	/	/	7
	TAR2	1	1	/	/	2
	TAR3	1	/	/	/	1
	TAR4	1	/	/	/	1
Phalange		14	10	/	45	69

## Sheet: SI_Tab_6
Supplementary Table 6 Seal long bone fragments recovered from the Tonkij Ushkany Island
		NISP				Total
		Right	Left	Axial	Indet.
Humerus		15	14	/	2	31
Ulna		11	14	/	/	25
Radius		10	13	/	/	23
Femur		13	12	/	1	26
Fibula		6	7	/	1	14
Tibia		24	24	/	2	50
Tibio-fibula		/	1	/	/	1

## Sheet: SI_Tab_7
Supplementary Table 7 Minimum Number of Element (MNE) and percent Minimum Animal Units (%MAU) values for the seal remains, including bilateral MAU estimates for right and left, non-including indeterminate sides.
		MNE	Avg. MAU	%MAU	Right MAU	R % MAU	Left MAU	L % MAU
Cranium		5	5	32.26	/	/	/	/
Mandible		14	7	45.16	5	31.25	9	56.25
Temporal		12	6	38.71	6	37.5	6	37.5
Palatine		1	1	6.45	/	/	/	/
Pterygoid		1	1	6.45	/	/	/	/
Occipital		2	2	12.9	/	/	/	/
Scapula		14	7	45.16	6	37.5	8	50
Radius		13	6.5	41.94	6	37.5	7	43.75
Ulna		17	8.5	54.84	8	50	9	56.25
Humerus		23	11.5	74.19	10	62.5	12	75
Carpal		1	0.1	0.46	/	/	/	/
Metacarpal	/	1	0.1	0.65	/	/	/	/
	MC1	5	2.5	16.13	3	18.75	2	12.5
	MC2	3	1.5	9.68	1	6.25	2	12.5
	MC3	1	0.5	3.23	/	/	1	6.25
	MC4	2	1	6.45	2	12.5	/	/
	MC5	2	1	6.45	1	6.25	1	6.25
Cervical		17	2.42	15.67	/	/	/	/
Thoracic		38	2.53	16.34	/	/	/	/
Lumbar		15	3	19.35	/	/	/	/
Sacrum		8	8	51.61	/	/	/	/
Bacculum		1	1	6.45	/	/	/	/
Pelvis		9	4.5	29.03	5	31.25	4	25
Fibula		9	4.5	29.03	4	25	5	31.25
Tibia		31	15.5	100	16	100	15	93.75
Femur		14	7	45.16	8	50	6	37.5
Tarsal	Calcaneus	4	2	12.9	2	12.5	2	12.5
	Talus	10	5	32.26	7	43.75	3	18.75
	TAR1	5	2.5	16.13	5	31.25	/	/
	TAR2	2	1	6.45	1	6.25	1	6.25
	TAR3	1	0.5	3.23	1	6.25	/	/
	TAR4	1	0.5	3.23	1	6.25	/	/
Metatarsal	/	1	0.1	0.65	/	/	/	/
	MT1	13	6.5	41.94	5	31.25	6	37.5
	MT2	9	4.5	29.03	2	12.5	7	43.75
	MT3	12	6	38.71	7	43.75	5	31.25
	MT4	11	5.5	35.48	3	18.75	9	56.25
	MT5	5	2.5	16.13	3	18.75	2	12.5
Phalange	Proximal	51	5.1	32.9	2.4	15	2	12.5
	Intermediate	14	1.4	9.03	1	6.25	/	/
	Distal	0	0	0	/	/	/	/

## Sheet: SI_Tab_8
Supplementary Table 8 Frequency of butchery marks and butchery process assessment based on remains of Baikal seals from the Ushkany Islands
Species	Skeletal region			Part of element	NISP	# of Cut NISP *	# of Cut marks*	# of Scrape NISP*	# of Chop NISP	# of spiral breakages	# of impact	# of Fresh fractures	Butchery proccess
		Skeletal element									notches
Pusa sibirica	Head	Cranium			6	2	12						Skinning
		Mandible			24					1			Disarticulation?
		Occipital			6	1	2						Gross dismemberment - decapitation
		Temporal			20	2	15		3			1	Disarticulation of mandible?
		Tooth			3
	Forelimb	Scapula			14	3	13		1				Gross dismemberment
		Humerus		Total	29	10	83	1	3			3
				Fused proximal		2	2						Gross dismemberment
				Unfused proximal		1	5
				Mid shaft		3	52			1			Defleshing/Marrow extraction?
				Unfused midshaft		2	26
				Distal		3	9						Disarticulation
		Ulna		Total	24	3	21		2		5	6
				Mid shaft		1	2						Defleshing
				Distal		4	13						Disarticulation/Defleshing
		Radius		Total	18	3	13		1
				Proximal		2	12						Disarticulation
				Distal		1	1						Disarticulation
		Metacarpals			14	3	7						Skinning
	Pelvic girdle	Innominate			9	2	10			2	1		Gross dismemberment
	Hindlimb	Femur		Total	21	7	29				1	3
				Fused proximal		4	7						Gross dismemberment
				Unfused proximal		1	4	1					Defleshing?
				Mid shaft		2	10			1			Defleshing/Marrow extraction?
				Distal		1	7						Disarticulation
		Tibio-fibula		Total	59	12	63	4	5	7	5	12
				Fused mid shaft		5	16	3	4				Defleshing
				Unfused mid shaft		4	34	1	1				Defleshing
				Distal		6	13						Skinning?/Disarticulation
		Calcaneus			4				2		1		Disarticulation?
		Talus			11	3	8	1	1				Gross dismemberment - decapitation
		Tarsals			5	2	5					1	Skinning?/Disarticulation?
		Metatarsals			52	15	75	7	3	2	1	5	Skinning (NISP=10)/ Defleshing (NISP=5?)/ Marrow extraction (NISP=1?)
	Axial skeleton	Vertebrae										1	Gross dismemberment/Disarticulation
				Atlas	8	3	9		3				Gross dismemberment - decapitation
			Axis+Cervical		19	6	30		3				Gross dismemberment/Disarticulation
				Lumbar	15	6	15		7				Gross dismemberment/Disarticulation
				Thoratic	36	8	20	1	10				Gross dismemberment/Disarticulation
				Sacrum	10	3	10						Gross dismemberment/Disarticulation
	Others	Phalanges			69	9	38		4	2	1	7	Skinning?
		Bacculum			1
TOTAL					477	103	478	19	53	16	15	38
c.f. Pusa sibirica	Limb	Metacarpals			2	1	1
		Metatarsals			1			1				1
		Phalanges			13
	Ribcage	Ribs			47	4	7	1		1	2		Evisceration?

## Sheet: SI_Tab_9
Supplementary Table 9 Anthropic modifications in bone fragments recovered from Tonkij Ushkany Island
TNF	NISP	Burning		Calcination		Butchery	Tools/Ornaments
		Partial (1,2)	Total	Partial	Total
			3	(4G,4M)	5
940	895	329	95	309	86	325	0

[truncated: 6 more sheets: SI_Tab_10, SI_Tab_11, SI_Tab_12, SI_Tab_13, SI_Tab_14, SI_Tab_15]
